# Supplementary material for: Stabilizing subnanometer Ag(0) nanoclusters by thiolate and diphosphine ligands and their crystal structures
Source: Royal Society of Chemistry journal article supplement (doi:10.1039/c3nr34328f), 2013-01-01
Supplement: c3nr34328f.pdf [file c3nr34328f.pdf]

Supporting information for

## Crystal Structures of Two Ag(0)-Containing Nanoclusters Co-Capped by Thiolate and Diphosphine Ligands

Huayan Yang,<sup>1</sup> Yu Wang,<sup>1</sup> and Nanfeng Zheng<sup>1,\*</sup>

<sup>1</sup> State Key Laboratory for Physical Chemistry of Solid Surfaces and Department of Chemistry, College of Chemistry and Chemical Engineering, Xiamen University, Xiamen 361005, China  
Email: nfzheng@xmu.edu.cn

### Experimental Details

**Reagents:** Silver tetrafluoroborate (AgBF<sub>4</sub>, A.R.), 3,4-difluorothiophenol (C<sub>6</sub>H<sub>4</sub>F<sub>2</sub>S, A.R.), 4-(trifluoromethyl)thiophenol (C<sub>7</sub>H<sub>5</sub>F<sub>3</sub>, A.R.), 1,2-bis(diphenylphosphino)ethane (DPPE, A.R.), tetraphenylphosphonium bromide (PPh<sub>4</sub>Br, A.R.) were purchased from Alfa Aesar Chemical Reagent Co. Ltd. (Tianjin, China), Sodium borohydride (NaBH<sub>4</sub>, A.R.), dichloromethane (CH<sub>2</sub>Cl<sub>2</sub>, A.R.), and methanol (CH<sub>3</sub>OH, A.R.) were purchased from Sinopharm Chemical Reagent Co. Ltd. (Shanghai, China). The water used in all experiments was ultrapure. All reagents were used as received without further purification.

**Synthesis of Ag<sub>16</sub>(SC<sub>6</sub>H<sub>3</sub>F<sub>2</sub>)<sub>14</sub>(DPPE)<sub>4</sub> clusters:** 19.6 mg AgBF<sub>4</sub> was dissolved in the mixture solution of dichloromethane and methanol. After the solution was cooled to 0 °C in an ice bath, 10.3 mg 1,2-bis(diphenylphosphino)ethane and 9.7 μL 3,4-difluorothiophenol were added. About 60 minutes later, 1.0 mL aqueous solution containing 30.0 μL triethylamine and 20.0 mg NaBH<sub>4</sub> was added quickly to the above mixture under vigorous stirring. The reaction was aging for 12 hours at 0 °C. The aqueous phase was then removed. The mixture in organic phase was then washed several times with water. Then 5.0 mg PPh<sub>4</sub>Br were added to the solution. Red sheet

crystals were crystallized from CH<sub>2</sub>Cl<sub>2</sub>/hexane at 4 °C after 10 days. The yield of XMC-2 was ~ 20%.

**Synthesis of {Ag<sub>32</sub>(SC<sub>6</sub>H<sub>4</sub>CF<sub>3</sub>)<sub>24</sub>(DPPE)<sub>5</sub>}<sup>2-</sup> clusters:** 20.0 mg AgBF<sub>4</sub> was dissolved in the mixture solution of dichloromethane and methanol. After the solution was cooled to 0 °C, 6.0 mg 1,2-bis(diphenylphosphino)ethane and 20.0 μL 4-(trifluoromethyl)thiophenol were added. About 60 minutes later, 1.0 mL aqueous solution containing 30.0 μL triethylamine and 20.0 mg NaBH<sub>4</sub> was added quickly to the above mixture under vigorous stirring. The reaction was aging for 24 hours at 0 °C. The aqueous phase was then removed. The mixture in organic phase was washed several times with water. 5.0 mg PPh<sub>4</sub>Br were added to the solution. Black block crystals were crystallized from CH<sub>2</sub>Cl<sub>2</sub>/hexane at 4 °C after 10 days. The yield of XMC-2 was ~ 25%.

#### Single Crystal Analysis of XMC-2 and XMC-3:

The diffraction data of XMC-2 were collected on an Agilent Technologies SuperNova system. X-ray single crystal diffractometer with Cu Kα radiation ( $\lambda = 1.54184$  Å) at 100 K. The data were processed using CrysAlis<sup>Pro</sup>.<sup>1</sup> The structure was solved and refined using Full-matrix least-squares based on  $F^2$  with program SHELXS-97 and SHELXL-97<sup>2</sup> within Olex2.<sup>3</sup> In the structure of XMC-2, several F atoms at the 3-position of benzene rings of the ligand of 3,4-difluorothiophenol were found to be disordered and modeled over both in 3- and 5- positions of benzene ring. All non-hydrogen atoms in the cluster were anisotropically refined to obtain the final R factor.

Crystallographic data for XMC-2:  $I4_1/a$ ,  $a = 25.3878(3)$  Å,  $b = 25.3878(3)$  Å,  $c = 72.3758(11)$  Å,  $\alpha = \beta = \gamma = 90^\circ$ ,  $V = 46649.2(10)$  Å<sup>3</sup>,  $Z = 8$ , Cu Kα,  $T = 100$  K,  $2\theta = 127.38^\circ$ . 48569 reflections were measured, of which 19090 were unique with  $R_{\text{int}} = 0.0438$ . Final  $R_1 = 6.94\%$ ,  $wR_2 = 0.1999$  for 1112 parameters and 13710 reflections with  $I > 2\sigma(I)$ .

The diffraction data of XMC-3 were collected on a Rigaku RAXIS-RAPID (Mo Kα). Absorption corrections were applied by using the program ABSCOR (Higashi,

1995). The structure was solved by direct methods and refined by the least-squares method using the program SHELXS.

Crystallographic data for XMC-3:  $C2/c$ ,  $a = 49.221(10)$  Å,  $b = 22.630(5)$  Å,  $c = 40.889(8)$  Å,  $\alpha = 90^\circ$ ,  $\beta = 120.01(3)^\circ$ ,  $\gamma = 90^\circ$ ,  $V = 39437(14)$  Å<sup>3</sup>,  $Z = 4$ , Mo  $K\alpha$ ,  $T = 173$  K,  $2\theta = 49.42^\circ$ . 163584 reflections were measured, of which 40266 were unique with  $R_{\text{int}} = 0.1177$ . Final  $R_1 = 6.59\%$ ,  $wR_2 = 0.1817$  for 1973 parameters and 26942 reflections with  $I > 2\sigma(I)$ .

1. CrysAlis<sup>Pro</sup> Version 1.171.35.19. (2011). Agilent Technologies Inc. Santa Clara, CA, USA.
2. Sheldrick, G. M. (2008). A short history of SHELX. *Acta Cryst. A* **64**, 112-122.
3. Dolomanov et al. (2009). OLEX2: a complete structure solution, refinement and analysis program. *J. Appl. Cryst.* **42**, 339-341.

### Measurements of Optical Properties:

Pure crystals of XMC-2 and XMC-3 were dissolved in dichloromethane ( $\text{CH}_2\text{Cl}_2$ ) for spectrum measurements. UV/Vis absorption spectra were recorded on a Varian Carry 5000 spectrophotometer. Fluorescence spectra were measured on a Hitachi F-7000 spectrometer.

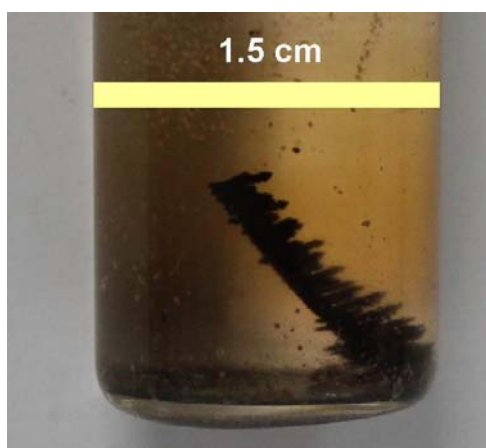

**Figure S1** Photograph of XMC-2 crystallized into a single big piece of red crystal.

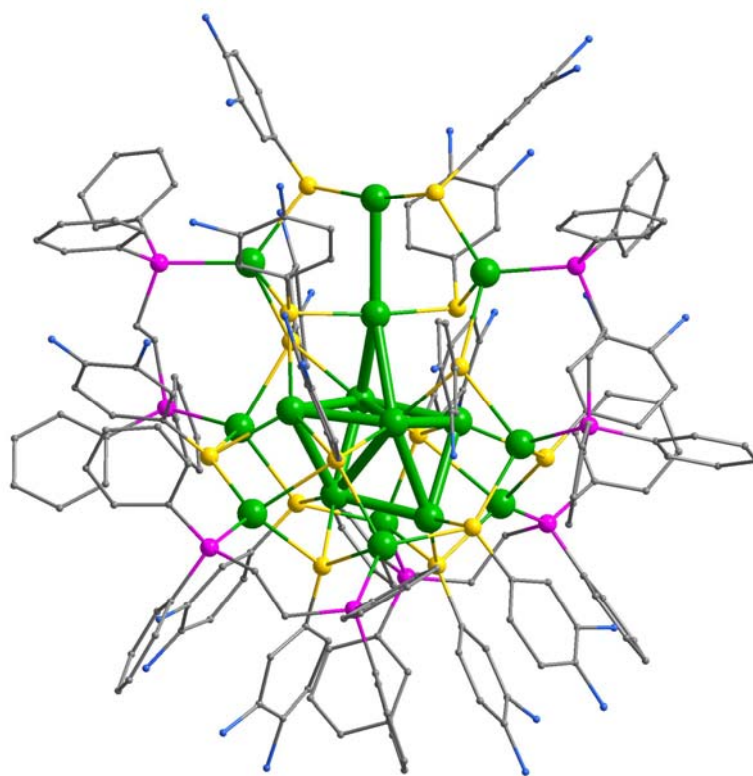

**Figure S2** Crystal structure of  $\text{Ag}_{16}(\text{SC}_6\text{H}_3\text{F}_2)_{14}(\text{DPPE})_4$  (XMC-2) with only hydrogen atoms omitted. Color legend: green, Ag; yellow, S; pink, P; gray, C; blue, F.

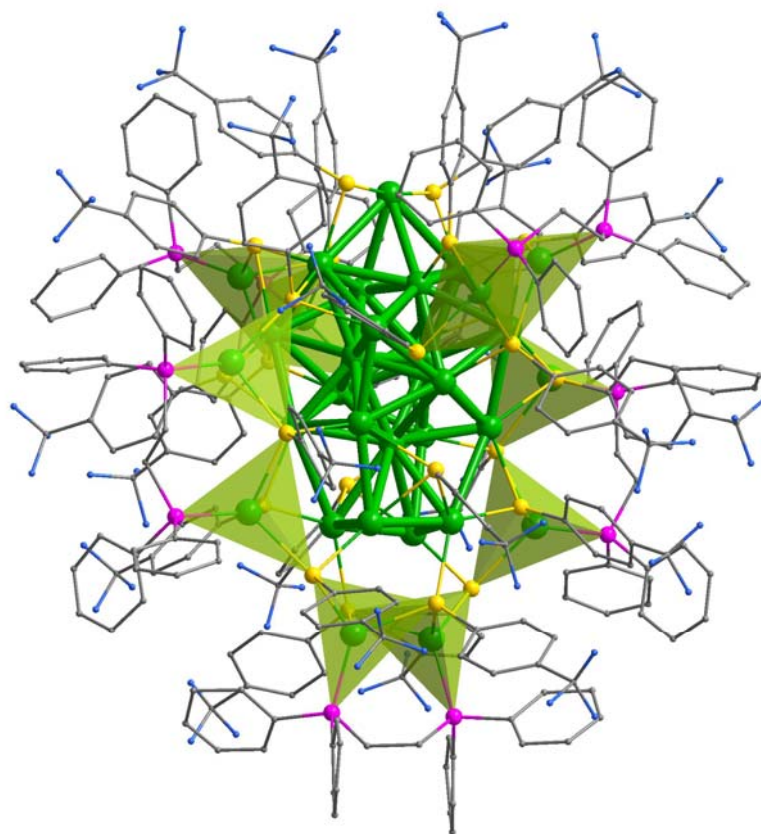

**Figure S3** Crystal structure of  $\{\text{Ag}_{32}(\text{DPPE})_5(\text{SC}_6\text{H}_4\text{CF}_3)_{24}\}^{2-}$  (XMC-3) with only hydrogen atoms omitted. Color legend: green, Ag; yellow, S; pink, P; gray, C; blue, F.

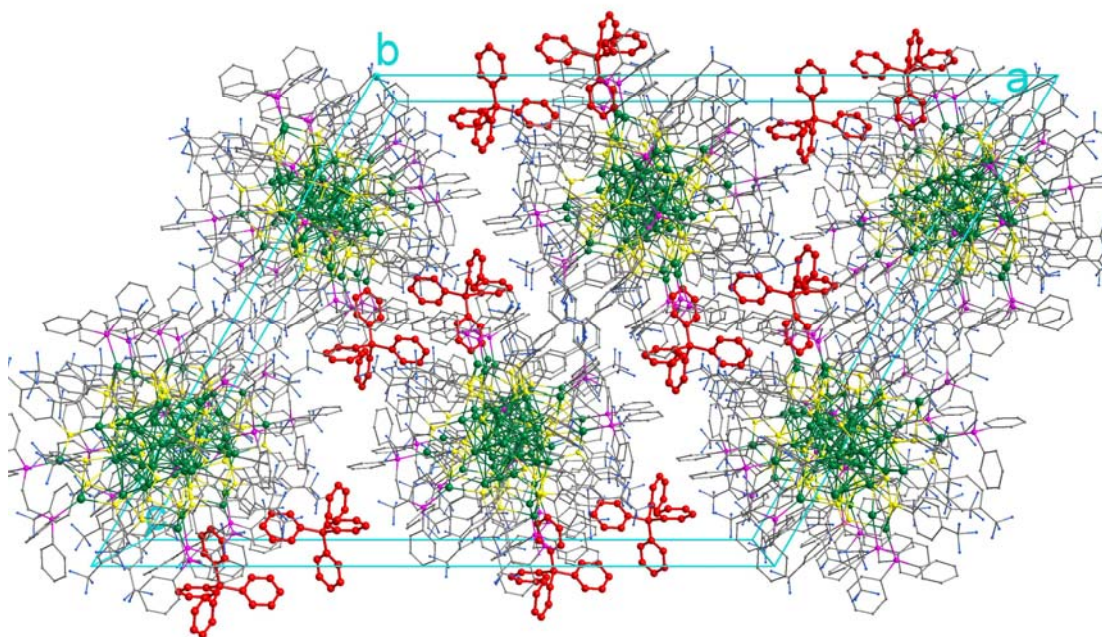

**Figure S4** The packing structure of XMC-3 with  $\text{PPh}_4^+$ . The  $\text{PPh}_4^+$  cations are highlighted in red for better visualization. Color legend for the cluster parts: green, Ag; yellow, S; pink, P; gray, C; blue, F.

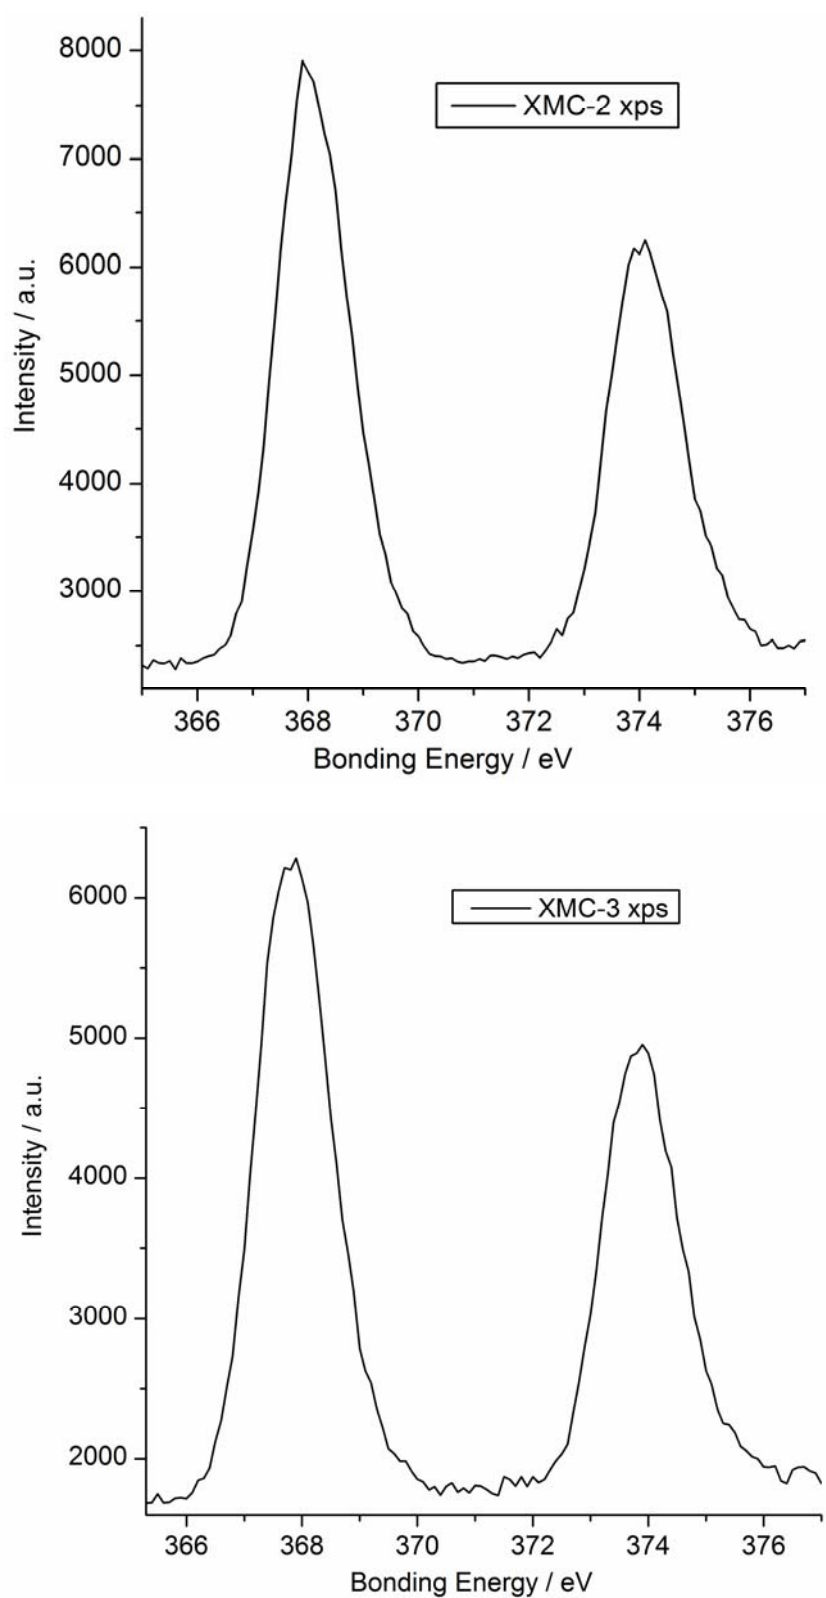

**Figure S5** Ag-3d XPS spectra of XMC-2 and XMC-3.
